# Supplementary material
Source: PubMed Central journal article supplement (PMC7853318)
Supplement: 12862_2020_1732_MOESM1_ESM.pdf [file 12862_2020_1732_MOESM1_ESM.pdf]

**Additional Table 1** The full virus names abbreviations host species and GenBank/GISAID accession numbers for all genomes analysed in our study.

| Organism name                       | Abbreviation                   | Host     | Accession number (GenBank, GISAID) |
|-------------------------------------|--------------------------------|----------|------------------------------------|
| hCoV-19/Australia/VIC231/2020       | Hu Australia<br>VIC231 2020    | Human    | EPI_ISL_419926                     |
| hCoV-19/USA/UT-00346/2020           | Hu USA UT 00346<br>20202       | Human    | EPI_ISL_420819                     |
| BetaCoV/Wuhan-Hu-1                  | Hu Wuhan 2020                  | Human    | NC_045512.2                        |
| hCoV-19/Italy/TE4836/2020           | Hu Italy TE4836<br>2020        | Human    | EPI_ISL_418260                     |
| Bat coronavirus RaTG13              | RaTG13                         | Bat      | MN996532.1                         |
| hCoV-19/pangolin/Guangdong/1/2019   | Guangdong<br>Pangolin 1 2019   | Pangolin | EPI_ISL_410721                     |
| hCoV-19/pangolin/Guangdong/P2S/2019 | Guangdong<br>Pangolin P2S 2019 | Pangolin | EPI_ISL_410544                     |
| PCoV_GX-P5E                         | Guangxi Pangolin<br>P5E        | Pangolin | MT040336                           |
| PCoV_GX-P2V                         | Guangxi Pangolin<br>P2V        | Pangolin | MT072864                           |
| PCoV_GX-P5L                         | Guangxi Pangolin<br>P5L        | Pangolin | MT040335                           |
| PCoV_GX-P1E                         | Guangxi Pangolin<br>P1E        | Pangolin | MT040334.1                         |
| PCoV_GX-P4L                         | Guangxi Pangolin<br>P4L        | Pangolin | MT040333                           |
| bat-SL-CoVZC45                      | Bat CoVZC45                    | Bat      | MG772933.1                         |
| bat-SL-CoVZXC21                     | Bat CoVZXC21                   | Bat      | MG772934.1                         |
| BtCoV/273/2005                      | BtCoV 273 2005                 | Bat      | DQ648856.1                         |
| Bat SARS coronavirus Rf1            | Rf1                            | Bat      | DQ412042.1                         |
| Bat SARS coronavirus HKU3-12        | HKU3-12                        | Bat      | GQ153547.1                         |
| Bat SARS coronavirus HKU3-6         | HKU3-6                         | Bat      | GQ153541.1                         |
| BtCoV/279/2005                      | BtCoV 279 2005                 | Bat      | DQ648857.1                         |
| SARS coronavirus BJ01               | SARS                           | Human    | AY278488.2                         |

|                                                         |                  |        |             |
|---------------------------------------------------------|------------------|--------|-------------|
| SARS coronavirus                                        | Tor2             | Human  | NC_004718.3 |
| SARS coronavirus BJ182-4                                | SARS-CoV BJ182-4 | Human  | EU371562    |
| Bat SARS-like coronavirus Rs3367                        | Rs3367           | Bat    | KC881006.1  |
| SARS-related coronavirus BtKY72                         | BtKY72           | Bat    | KY352407.1  |
| Bat coronavirus BM48-31/BGR/2008                        | BM48 31 BGR 2008 | Bat    | GU190215.1  |
| Human betacoronavirus 2c EMC/2012                       | MERS-CoV S       | Human  | JX869059    |
| Bat coronavirus HKU5-1                                  | Bat HKU5-1       | Bat    | NC_009020   |
| Bat coronavirus HKU4-1                                  | Bat HKU4-1       | Bat    | NC_009019   |
| Feline infectious peritonitis virus                     | Feline per       | Cat    | NC_002306   |
| Human coronavirus HKU1                                  | HKU1             | Human  | NC_006577   |
| Human coronavirus HKU1 (isolate N2)                     | HKU1 N2          | Human  | Q14EB0      |
| Human coronavirus HKU1 (isolate N1)                     | HKU1 N1          | Human  | 5GNB_A      |
| Murine coronavirus RA59/R13                             | Murine RA59/R13  | Mouse  | ACN89689    |
| Murine hepatitis virus strain 4                         | Murine hep 4     | Mouse  | P22432      |
| Murine hepatitis virus strain JHM                       | Murine JHM       | Mouse  | NC_006852   |
| Mouse hepatitis virus strain MHV-A59 C12 mutant         | Murine A59       | Mouse  | NC_001846   |
| Murine hepatitis virus                                  | Murine virus     | Mouse  | ABS87264    |
| Rat coronavirus Parker                                  | Rat Parker       | Rat    | NC_012936   |
| Rabbit coronavirus HKU14                                | Rabbit HKU14     | Rabbit | NC_017083   |
| Equine coronavirus                                      | Equine NC99      | Horse  | NC_010327   |
| Porcine hemagglutinating encephalomyelitis virus        | Porcine v        | Pig    | NC_007732   |
| Human coronavirus OC43                                  | Human OC43       | Human  | NC_005147   |
| Human enteric coronavirus strain 4408                   | Human ent 4408   | Human  | NC_012950   |
| Bovine coronavirus                                      | Bovine CoV       | Calf   | NC_003045   |
| Bovine respiratory coronavirus AH187                    | Bovine AH187     | Calf   | NC_012948   |
| Bovine respiratory coronavirus bovine/US/OH-440-TC/1996 | Bovine OH440     | Calf   | NC_012949   |

**Additional Table 2.** The most appropriate evolutionary model found by the MegaX program for each gene/genome region analysed in our study, with the corresponding optimal parameters Gamma (G) and Intensity (I), as well as the values of Bayesian Information Criterion (BIC). For the RB domain, amino acid sequences were analysed.

| <b>Region</b>          | <b>Evolutionary model</b> | <b>G</b> | <b>I</b> | <b>BIC</b> |
|------------------------|---------------------------|----------|----------|------------|
| Gene ORF1ab            | GTR                       | 1.24     | 0.46     | 236358.279 |
| RB domain (25 species) | WAG                       | 0.41     | -        | 3861.345   |
| Gene S                 | GTR                       | 1.5      | 0.37     | 53988.111  |
| Gene ORF3a             | HKY                       | 0.47     | -        | 10517.624  |
| Gene E                 | HKY                       | 0.05     | -        | 1637.944   |
| Gene M                 | TN93                      | 0.24     | -        | 6488.936   |
| Gene ORF6              | HKY                       | 0.7      | -        | 2384.256   |
| Gene ORF7a             | HKY                       | 0.48     | -        | 4617.462   |
| Gene ORF7b             | HKY                       | -        | 0.31     | 1761.699   |
| Gene ORF8              | HKY                       | 0.96     | 0.05     | 4966.318   |
| Gene N                 | GTR                       | 1.24     | 0.38     | 11781.432  |
| Gene ORF10             | JC                        | 0.16     | -        | 984.213    |
| Whole genome           | GTR                       | 1.22     | 0.43     | 346054.493 |
| RB domain (46 species) | WAG                       | 3.15     | -        | 12067.696  |
